# Supplementary material
Source: ML conference proceedings conference paper supplement (https://openaccess.thecvf.com/content/CVPR2022/html/Sun_DiSparse_Disentangled_Sparsification_CVPR_2022_paper.html)
Supplement: Supplementary file 1 [file Sun_DiSparse_Disentangled_Sparsification_CVPR_2022_supplemental.pdf]

## Appendix

### Comparison With MTL Methods

As mentioned in the Empirical Evaluation Section, DiSparse surpasses several dedicated multitask learning approaches despite the high sparsity enforced in our model. In Table 1, we show comparison of DiSparse in both

static and dynamic sparse training setting with several MTL approaches including DEN [1], Sluice [10], and Cross-Stitch [8] applied on exactly the same model with the same optimization settings. The superiority of DiSparse is clearly observed in the table, demonstrating that DiSparse is not only an effective compression approach but also a powerful tool for multitask learning.

| Model                       | T1: Semantic Seg. |                     | T2: SN Prediction     |                         |                  |                 |               | Sparsity (%) $\uparrow$ | Pre-trained |
|-----------------------------|-------------------|---------------------|-----------------------|-------------------------|------------------|-----------------|---------------|-------------------------|-------------|
|                             | mIoU $\uparrow$   | PixelAcc $\uparrow$ | Mean Err $\downarrow$ | Median Err $\downarrow$ | 11.25 $\uparrow$ | 22.5 $\uparrow$ | 30 $\uparrow$ |                         |             |
| Cross-Stitch [8]            | 25.3              | 57.4                | 16.6                  | 13.2                    | 43.7             | 72.4            | 83.8          | 0                       | $\times$    |
| Sluice [10]                 | 26.6              | 59.1                | 16.6                  | <b>13.0</b>             | <b>44.1</b>      | 73.0            | 83.9          | 0                       | $\times$    |
| DEN [1]                     | 26.3              | 58.8                | 17.0                  | 14.3                    | 39.5             | 72.2            | 84.7          | 0                       | $\times$    |
| DiSparse( <i>Static</i> )   | 26.5              | 57.8                | <b>16.4</b>           | 13.7                    | 41.2             | <b>74.1</b>     | <b>85.9</b>   | <b>90</b>               | $\times$    |
| DiSparse ( <i>Dynamic</i> ) | <b>28.2</b>       | <b>59.2</b>         | 16.5                  | 13.5                    | <b>42.3</b>      | 73.1            | 84.7          | <b>90</b>               | $\times$    |

Table 1. DiSparse semantic segmentation and surface normal prediction results on NYU-v2 [9] compared to other MTL approaches.

| Model                    | T1: Semantic Seg. |                     | T2: SN Prediction     |                         |                  |                 |               | Sparsity (%) $\uparrow$ | Pre-trained  |
|--------------------------|-------------------|---------------------|-----------------------|-------------------------|------------------|-----------------|---------------|-------------------------|--------------|
|                          | mIoU $\uparrow$   | PixelAcc $\uparrow$ | Mean Err $\downarrow$ | Median Err $\downarrow$ | 11.25 $\uparrow$ | 22.5 $\uparrow$ | 30 $\uparrow$ |                         |              |
| DeepLab [2](baseline)    | 27.69             | 58.77               | 16.55                 | 14.17                   | 39.62            | 73.54           | 86.33         | 0                       | N/A          |
| LTH [5]                  | 23.84             | 56.35               | 16.81                 | 13.84                   | 40.91            | 72.31           | <b>84.28</b>  | 30.00                   | $\checkmark$ |
| SNIP [7]                 | 26.57             | 59.85               | 16.91                 | 13.55                   | 42.01            | 71.72           | 82.01         | 30.00                   | $\times$     |
| Random                   | 25.08             | 55.56               | 17.60                 | 14.27                   | 40.49            | 70.12           | 81.68         | 30.00                   | $\times$     |
| DiSparse ( <i>Ours</i> ) | <b>28.24</b>      | <b>60.33</b>        | <b>16.62</b>          | <b>13.37</b>            | <b>42.98</b>     | <b>72.29</b>    | 83.96         | 30.00                   | $\times$     |
| RigL [4]                 | 24.83             | 57.92               | 16.78                 | 14.84                   | 37.76            | 72.18           | 86.15         | 30.00                   | $\times$     |
| DiSparse ( <i>Ours</i> ) | <b>28.41</b>      | <b>59.77</b>        | <b>16.54</b>          | <b>13.48</b>            | <b>43.42</b>     | <b>73.55</b>    | <b>86.76</b>  | 30.00                   | $\times$     |
| IMP [6]                  | 29.23             | 59.83               | 16.57                 | 13.38                   | 43.16            | 72.41           | <b>84.14</b>  | 30.00                   | $\checkmark$ |
| Random                   | 26.43             | 58.25               | 16.89                 | 13.71                   | 41.92            | 71.72           | 83.77         | 30.00                   | $\checkmark$ |
| DiSparse ( <i>Ours</i> ) | <b>29.44</b>      | <b>59.98</b>        | <b>16.56</b>          | <b>13.35</b>            | <b>43.21</b>     | <b>72.25</b>    | 84.06         | 30.00                   | $\checkmark$ |

Table 2. DiSparse semantic segmentation and surface normal prediction results on NYU-v2 [9] compared to static sparse training, dynamic sparse training, and pre-trained model pruning methods.

| Model                    | T1: Semantic Seg. |                     |                    | T2: Depth Prediction    |                         |                       |                         |                         | Sparsity (%) $\uparrow$ | Pre-trained  |
|--------------------------|-------------------|---------------------|--------------------|-------------------------|-------------------------|-----------------------|-------------------------|-------------------------|-------------------------|--------------|
|                          | mIoU $\uparrow$   | PixelAcc $\uparrow$ | Error $\downarrow$ | Abs. Error $\downarrow$ | Rel. Error $\downarrow$ | $\delta 1.25\uparrow$ | $\delta 1.25^2\uparrow$ | $\delta 1.25^3\uparrow$ |                         |              |
| DeepLab [2](baseline)    | 42.58             | 74.84               | 0.49               | 0.016                   | 0.33                    | 74.22                 | 88.90                   | 94.47                   | 0                       | N/A          |
| LTH [5]                  | 40.21             | 72.59               | 0.51               | 0.017                   | 0.36                    | 72.54                 | 87.39                   | 93.69                   | 30.00                   | $\checkmark$ |
| SNIP [7]                 | 41.03             | <b>74.65</b>        | 0.51               | 0.018                   | 0.36                    | 74.80                 | <b>89.53</b>            | 94.53                   | 30.00                   | $\times$     |
| Random                   | 38.17             | 72.77               | 0.52               | 0.019                   | 0.38                    | 72.83                 | 83.73                   | 92.33                   | 30.00                   | $\times$     |
| DiSparse ( <i>Ours</i> ) | <b>42.34</b>      | 74.55               | <b>0.49</b>        | <b>0.016</b>            | <b>0.33</b>             | <b>74.91</b>          | 89.22                   | <b>94.62</b>            | 30.00                   | $\times$     |
| RigL [4]                 | 40.68             | 74.40               | 0.51               | 0.018                   | 0.36                    | 72.47                 | <b>87.39</b>            | 93.53                   | 30.00                   | $\times$     |
| DiSparse ( <i>Ours</i> ) | <b>42.53</b>      | <b>74.82</b>        | <b>0.49</b>        | <b>0.016</b>            | <b>0.33</b>             | <b>74.62</b>          | 85.96                   | <b>93.73</b>            | 30.00                   | $\times$     |
| IMP [6]                  | 42.39             | 72.73               | 0.51               | <b>0.016</b>            | 0.36                    | 72.96                 | 87.80                   | 93.77                   | 30.00                   | $\checkmark$ |
| Random                   | 40.14             | 74.41               | 0.52               | 0.018                   | 0.39                    | 72.38                 | 87.90                   | 93.85                   | 30.00                   | $\checkmark$ |
| DiSparse ( <i>Ours</i> ) | <b>42.47</b>      | <b>74.69</b>        | <b>0.50</b>        | <b>0.016</b>            | <b>0.34</b>             | <b>73.32</b>          | <b>88.46</b>            | <b>94.37</b>            | 30.00                   | $\checkmark$ |

Table 3. DiSparse semantic segmentation and depth prediction results on Cityscapes [3] compared to static sparse training, dynamic sparse training, and pre-trained model pruning methods.

## Results at Lower Sparsity Levels

In the Empirical Evaluation Section, we showed the results of DiSparse and other pruning and sparse training approaches at high sparsity level(90%). Here, in Table 2, 3, we show the results at a sparsity of 30%, demonstrating the superiority of DiSparse at low sparsity level as well. From the table, we can see that DiSparse is better across all configurations and evaluation metrics. Moreover, we observed that DiSparse achieved lossless compression performance, achieving close or even better performance than the baseline unparsified model.

## References

- [1] Chanho Ahn, Eunwoo Kim, and Songhwai Oh. Deep elastic networks with model selection for multi-task learning. In *Proceedings of the IEEE/CVF International Conference on Computer Vision*, pages 6529–6538, 2019. 1
- [2] Liang-Chieh Chen, George Papandreou, Iasonas Kokkinos, Kevin Murphy, and Alan L Yuille. Deeplab: Semantic image segmentation with deep convolutional nets, atrous convolution, and fully connected crfs. *IEEE Transactions on Pattern Analysis and Machine Intelligence (TPAMI)*, 40(4):834–848, 2017. 1
- [3] Marius Cordts, Mohamed Omran, Sebastian Ramos, Timo Rehfeld, Markus Enzweiler, Rodrigo Benenson, Uwe Franke, Stefan Roth, and Bernt Schiele. The cityscapes dataset for semantic urban scene understanding. In *Proceedings of the IEEE conference on computer vision and pattern recognition*, pages 3213–3223, 2016. 1
- [4] Utku Evci, Trevor Gale, Jacob Menick, Pablo Samuel Castro, and Erich Elsen. Rigging the lottery: Making all tickets winners. In *International Conference on Machine Learning*, pages 2943–2952. PMLR, 2020. 1
- [5] Jonathan Frankle and Michael Carbin. The lottery ticket hypothesis: Finding sparse, trainable neural networks. In *International Conference on Learning Representations*, 2018. 1
- [6] Song Han, Huizi Mao, and William J Dally. Deep compression: Compressing deep neural networks with pruning, trained quantization and huffman coding. *arXiv preprint arXiv:1510.00149*, 2015. 1
- [7] Namhoon Lee, Thalaiyasingam Ajanthan, and Philip Torr. Snip: Single-shot network pruning based on connection sensitivity. In *International Conference on Learning Representations*, 2018. 1
- [8] Ishan Misra, Abhinav Shrivastava, Abhinav Gupta, and Martial Hebert. Cross-stitch networks for multi-task learning. In *Proceedings of the IEEE conference on computer vision and pattern recognition*, pages 3994–4003, 2016. 1
- [9] Pushmeet Kohli Nathan Silberman, Derek Hoiem and Rob Fergus. Indoor segmentation and support inference from rgb-d images. In *ECCV*, 2012. 1
- [10] Sebastian Ruder, Joachim Bingel, Isabelle Augenstein, and Anders Søgaard. Latent multi-task architecture learning. In *Proceedings of the AAAI Conference on Artificial Intelligence*, volume 33, pages 4822–4829, 2019. 1
